# Supplementary material for: High surface-area amidoxime-based polymer fibers co-grafted with various acid monomers yielding increased adsorption capacity for the extraction of uranium from seawater
Source: Royal Society of Chemistry journal article supplement (doi:10.1039/c6dt01114d), 2016-01-01
Supplement: c6dt01114d1.pdf [file c6dt01114d1.pdf]

# Supporting Information: High Surface-Area Amidoxime-Based Polymer Fibers Co-Grafted With Various Acid Monomers Yielding Increased Adsorption Capacity For The Extraction Of Uranium From Seawater

Yatsandra Oyola<sup>1\*</sup> and Sheng Dai<sup>1</sup>

<sup>1</sup> Chemical Sciences Division, Oak Ridge National Laboratory, P.O. Box 2008, Oak Ridge, TN 37831-6181, USA.

**Table S1.** Irradiation conditions for the PE fibers using the RDI Dynamitron electron beam.

| Irradiation Conditions for PE Fibers |                  |
|--------------------------------------|------------------|
| Beam Energy                          | 4.90 MeV         |
| Beam Current                         | 1.00 mA          |
| LMS3 Table Speed                     | 0.54 in/s        |
| Approximate Total Dose               | 200 kGy          |
| Estimated Dose per Pass              | 12 – 13 kGy/pass |
| Total number of passes               | 16               |
| Total Irradiation Time               | ~ 22 minutes     |

**Table S2.** List of all grafting solution compositions and the quantities to prepare the adsorbents derived from acrylic acid (AA), methacrylic acid (MAA) or vinyl sulphonic acid (VSA).

| Composition of grafting solution  | DMSO (mL) | AN (mL) | Acid (mL) | DMSO (mmol) | AN (mmol) | Acid (mmol) | wt. % DMSO | wt. % AN | wt. % Acid |
|-----------------------------------|-----------|---------|-----------|-------------|-----------|-------------|------------|----------|------------|
| 26.7% DMSO<br>73.3% (75/25 AN/AA) | 56.7      | 162     | 42        | 700         | 2473      | 608         | 26.7       | 55       | 18         |
| 25% DMSO<br>75% (70/30 AN/MAA)    | 49.7      | 142     | 49        | 700         | 2165      | 572         | 25         | 53       | 22         |
| 24.4% DMSO<br>75.6% (67/33AN/VSA) | 56.7      | 162     | 55.5      | 799         | 2473      | 125         | 24.4       | 51       | 25         |

**Table S3.** List of all grafting solution compositions and the quantities to prepare each Itaconic acid containing sample.

| <b>Composition of grafting solution</b> | <b>DMSO (mL)</b> | <b>AN (mL)</b> | <b>ITA (g)</b> | <b>DMSO (mmol)</b> | <b>AN (mmol)</b> | <b>ITA (mmol)</b> | <b>wt. % DMSO</b> | <b>wt. % AN</b> | <b>wt. % ITA</b> |
|-----------------------------------------|------------------|----------------|----------------|--------------------|------------------|-------------------|-------------------|-----------------|------------------|
| 26% DMSO<br>74% (75.5/24.5 AN/ITA)      | 56.7             | 162            | 42.5           | 799                | 2471             | 327               | 26.4              | 56              | 18               |
| 26% DMSO<br>74% (73.8/26.2 AN/ITA)      | 51.7             | 147.7          | 42.5           | 728                | 2253             | 327               | 26.0              | 55              | 19               |
| 26% DMSO<br>74% (75.5/24.5 AN/ITA)      | 56.75            | 162            | 42.5           | 799                | 2471             | 327               | 26.4              | 56              | 18               |
| 26% DMSO<br>74% (60.5/39.5 AN/ITA)      | 56.7             | 129.7          | 68.6           | 799                | 1979             | 527               | 26.4              | 45              | 29               |
| 26% DMSO<br>74% (65.5/34.5 AN/ITA)      | 56.7             | 140.5          | 59.9           | 799                | 2144             | 460               | 26.4              | 48              | 26               |
| 26% DMSO<br>74% (70.5/29.5 AN/ITA)      | 56.7             | 151.25         | 51.2           | 799                | 2307             | 393               | 26.4              | 52              | 22               |
| 26% DMSO<br>74% (80.5/19.5 AN/ITA)      | 56.7             | 172.7          | 33.8           | 799                | 2634             | 260               | 26.4              | 60              | 14               |
| 26% DMSO<br>74% (85.5/14.5 AN/ITA)      | 56.7             | 183.4          | 25.1           | 799                | 2798             | 193               | 26.4              | 63              | 11               |
| 26% DMSO<br>74% (90.5/9.5 AN/ITA)       | 56.7             | 194.1          | 16.5           | 799                | 2960             | 127               | 26.4              | 67              | 7                |

**Table S4.** List of all grafting solution compositions and the quantities to prepare each vinyl phosphonic acid (VPA) containing sample.

| <b>Composition of grafting solution</b> | <b>DMSO (mL)</b> | <b>AN (mL)</b> | <b>VPA (mL)</b> | <b>DMSO (mmol)</b> | <b>AN (mmol)</b> | <b>VPA (mmol)</b> | <b>wt. % DMSO</b> | <b>wt. % AN</b> | <b>wt. % VPA</b> |
|-----------------------------------------|------------------|----------------|-----------------|--------------------|------------------|-------------------|-------------------|-----------------|------------------|
| 23% DMSO<br>77% (63.4/36.6 AN/VPA)      | 56.7             | 162.0          | 55.4            | 799                | 2471             | 703               | 23                | 49              | 25               |
| 29% DMSO<br>71% (61.2/38.8 AN/VPA)      | 51.7             | 147.7          | 55.4            | 728                | 2253             | 703               | 29                | 43              | 28               |
| 30% DMSO<br>70% (63.4/36.6 AN/VPA)      | 56.8             | 162.0          | 55.4            | 799                | 2471             | 703               | 30                | 44              | 26               |
| 23% DMSO<br>77% (48.8/51.6 AN/VPA)      | 56.7             | 123.7          | 78.0            | 799                | 1888             | 989               | 23                | 38              | 39               |
| 23% DMSO<br>77% (53.4/46.6 AN/VPA)      | 56.7             | 136.5          | 70.4            | 799                | 2083             | 893               | 23                | 41              | 36               |
| 23% DMSO<br>77% (58.4/41.6 AN/VPA)      | 56.7             | 149.3          | 62.9            | 799                | 2278             | 797               | 23                | 45              | 32               |
| 23% DMSO<br>77% (68.4/31.6 AN/VPA)      | 56.7             | 174.9          | 47.8            | 799                | 2668             | 606               | 23                | 53              | 24               |
| 23% DMSO<br>77% (73.4/26.6 AN/VPA)      | 56.7             | 187.7          | 40.2            | 799                | 2863             | 510               | 23                | 57              | 20               |
| 23% DMSO<br>77% (78.4/21.6 AN/VPA)      | 56.7             | 200.5          | 32.7            | 799                | 3058             | 414               | 23                | 60              | 17               |

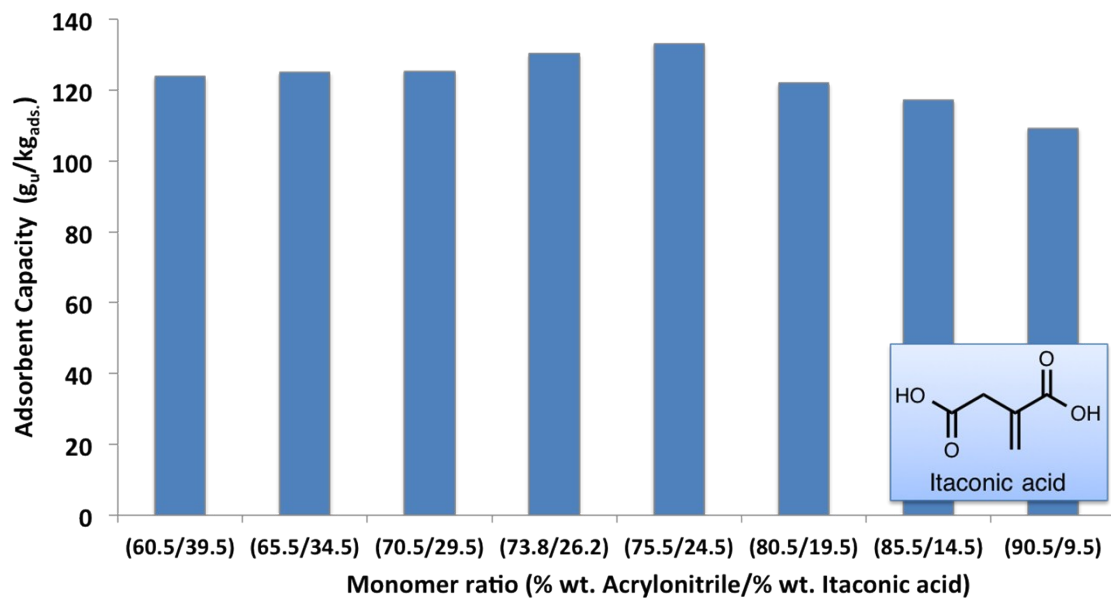

**Figure S1.** Comparison of the adsorption capacity using the laboratory screening protocol testing of fiber prepared with formulations of acrylonitrile/Itaconic acid with different ratios in DMSO.
